# Supplementary material for: RNA N6-methyladenosine demethylase FTO promotes breast tumor progression through inhibiting BNIP3
Source: PubMed Central journal article supplement (PMC6437932; doi:10.1186/s12943-019-1004-4), 2019-03-28
Supplement: 12943_2019_1004_MOESM7_ESM.pdf [file 12943_2019_1004_MOESM7_ESM.pdf]

# Supplemental Figure 4 (related to Figure 6)

36 breast tumor tissues

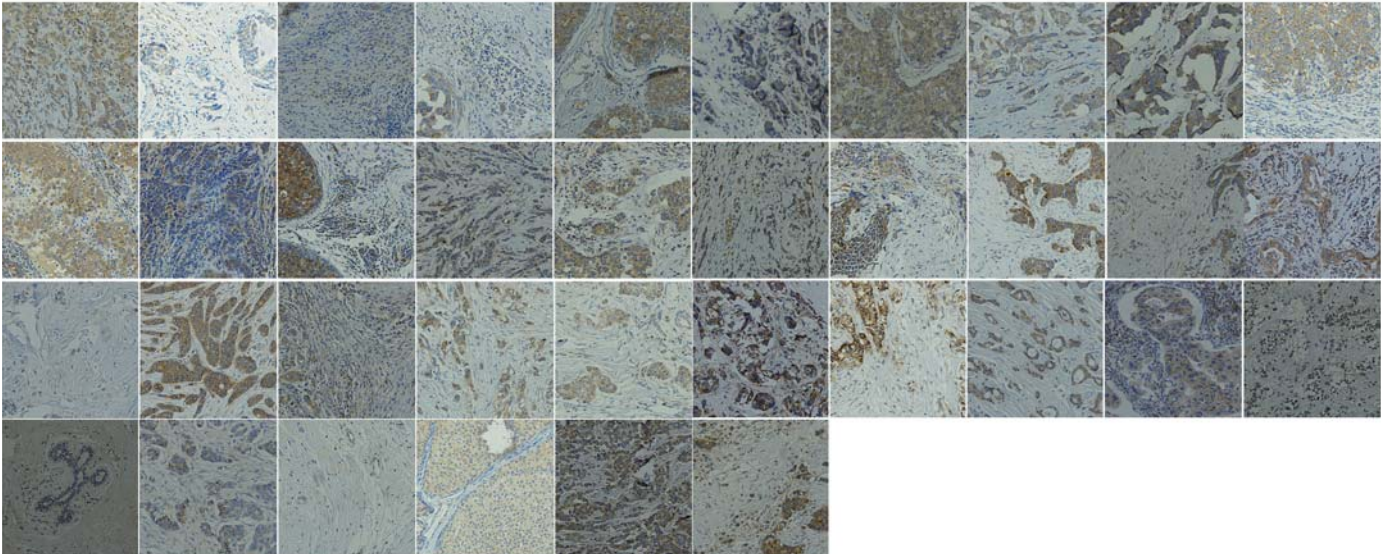

—  
1mm
