# Supplementary material for: RNA N6-methyladenosine demethylase FTO promotes breast tumor progression through inhibiting BNIP3
Source: PubMed Central journal article supplement (PMC6437932; doi:10.1186/s12943-019-1004-4), 2019-03-28

# Supplemental Figure 5 (related to Figure 7)

a

MDA-MB-231

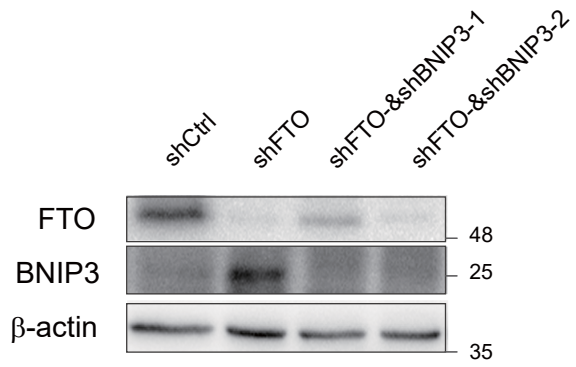

b

MCF-7

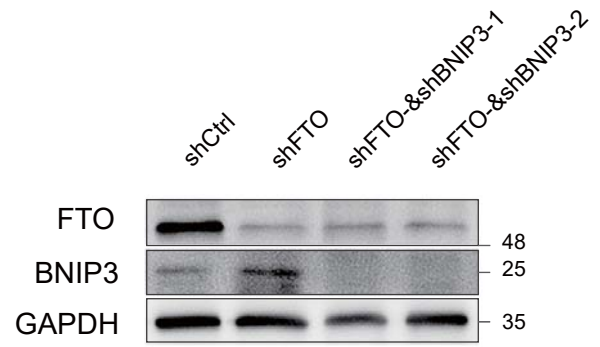

c

4T1

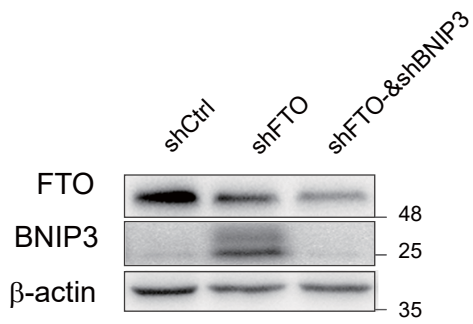

Supplement: 12943_2019_1004_MOESM8_ESM.pdf [file 12943_2019_1004_MOESM8_ESM.pdf]
